# Supplementary material for: The significant effect of heterojunction quality on photoelectrochemical water splitting in bilayer photoelectrodes: RbxWO3thin films on RbLaNb2O7layers
Source: Royal Society of Chemistry journal article supplement (doi:10.1039/c4cp03917c), 2014-11-07
Supplement: c4cp03917c1.pdf [file c4cp03917c1.pdf]

***Electronic Supplementary Information***

**Significant effect of heterojunction quality on  
photoelectrochemical water splitting in bilayer  
photoelectrodes:  $\text{Rb}_x\text{WO}_3$  thin films on  $\text{RbLaNb}_2\text{O}_7$  layers**

Tomohiko Nakajima,\* Takako Nakamura, and Tetsuo Tsuchiya

Advanced Manufacturing Research Institute, National Institute of Advanced Industrial Science and Technology,  
Tsukuba Central 5, 1-1-1 Higashi, Tsukuba, Ibaraki 305-8565, Japan.

## Sample preparation

### Substrate preparation

#### (010)-oriented $\text{RbLaNb}_2\text{O}_7$ on FTO glass

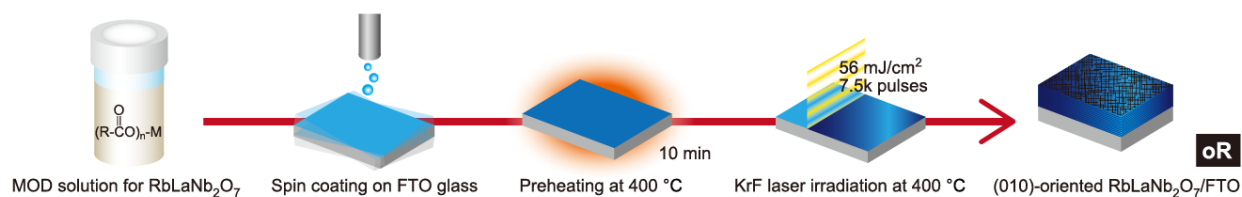

#### Unoriented $\text{RbLaNb}_2\text{O}_7$ on FTO glass

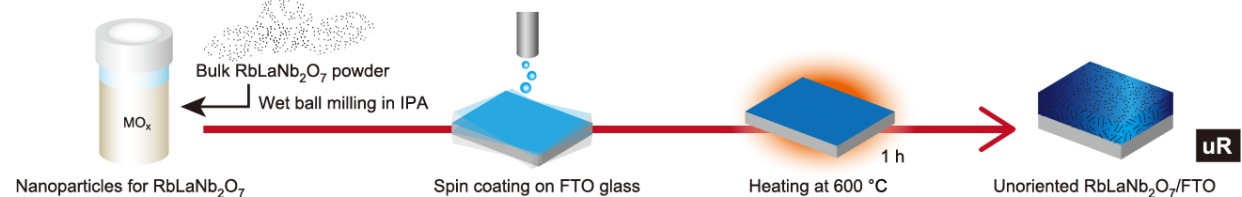

### $\text{Rb}_x\text{WO}_3$ film preparation

#### Oriented $\text{Rb}_x\text{WO}_3$ film on oR

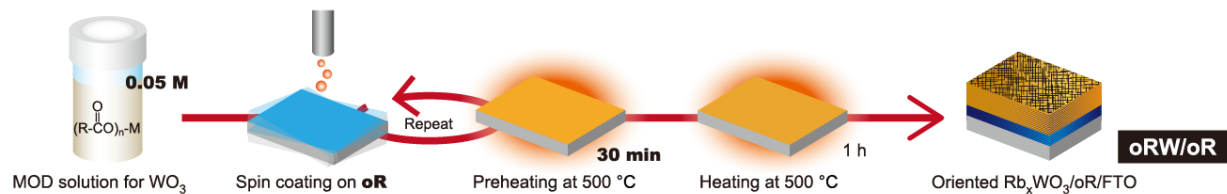

#### Partially oriented $\text{Rb}_x\text{WO}_3$ film on oR

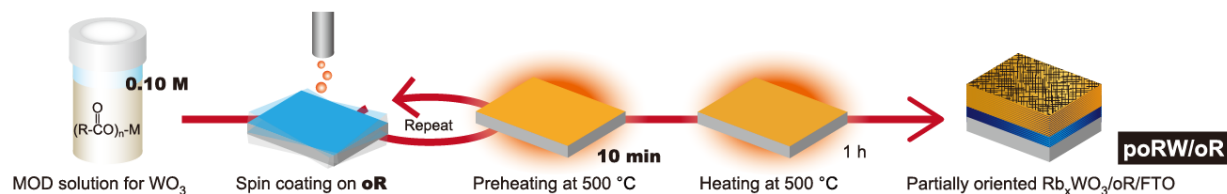

#### Unoriented $\text{Rb}_x\text{WO}_3$ film on uR

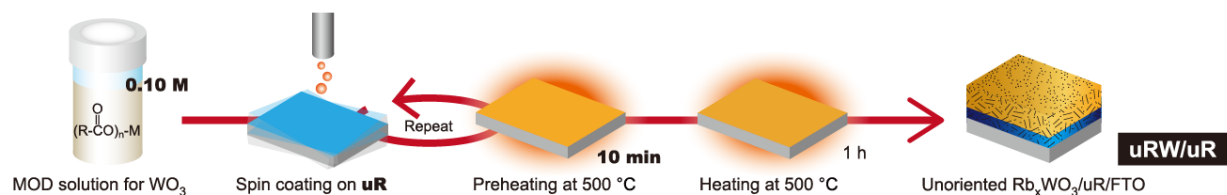

#### Unoriented $\text{Rb}_x\text{WO}_3$ film on bare FTO

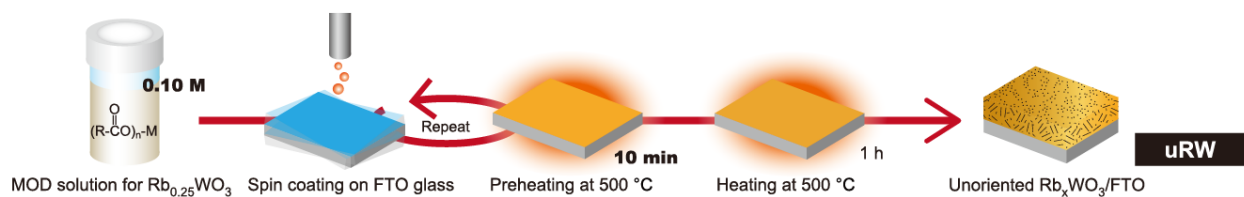

**Figure S1:** Process flow chart of prepared samples oR, uR, oRW/oR, poRW/oR, uRW/uR and uRW.
